# Supplementary material for: Smartphone-based fluorescence detection of bisphenol A from water samples
Source: Royal Society of Chemistry journal article supplement (doi:10.1039/c6ra27726h), 2017-01-01
Supplement: c6ra27726h1.pdf [file c6ra27726h1.pdf]

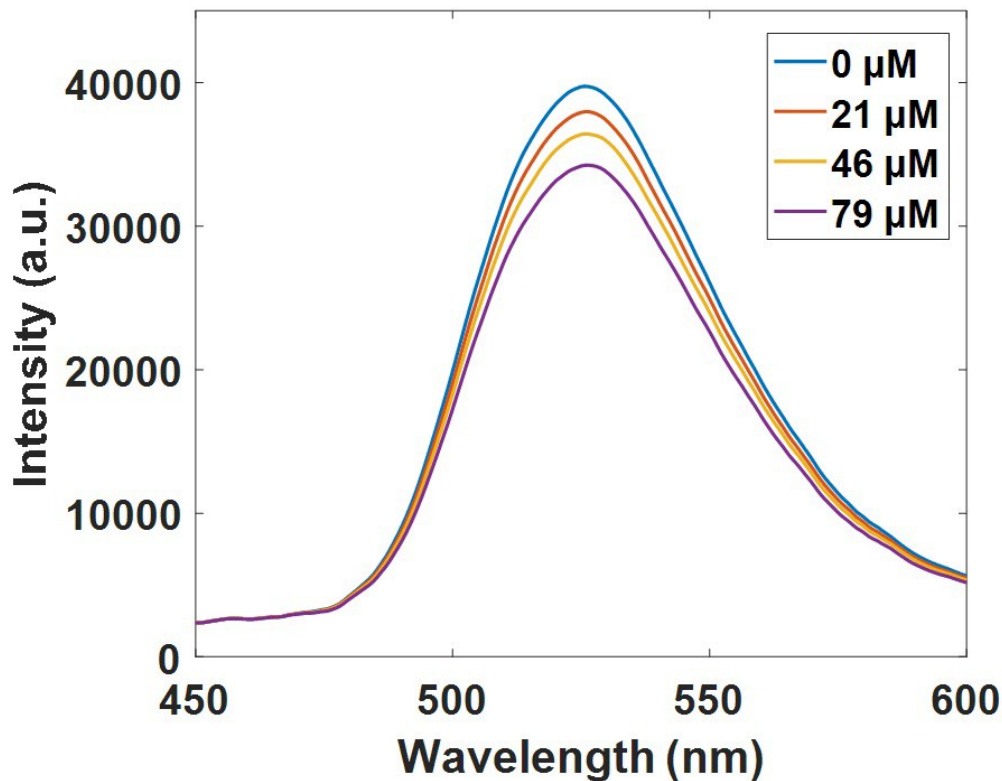

**Supplementary Figure S1.** Fluorescence spectra of HPTS (10 mM, pH 6.5, 22°C) in deionized water with increasing concentrations of BPA (0-79 μM). Spectra were measured at 90° from an incident 460 nm LED light source.
